# Supplementary material for: Estradiol induces apoptosis via activation of miRNA-23a and p53: implication for gender difference in liver cancer development
Source: PubMed Central journal article supplement (PMC4741500; doi:10.18632/oncotarget.5472), 2015-09-30
Supplement: oncotarget-06-34941-s001.pdf [file oncotarget-06-34941-s001.pdf]

## SUPPLEMENTARY TABLES AND FIGURES

**Supplementary Table S1: Primers and oligonucleotides used in this study**

| Name              | Sequence (5' to 3')      |
|-------------------|--------------------------|
| XIAP RT-F         | GAAGACCCTTGGGAACAACA     |
| XIAP RT-R         | CGCCTTAGCTGCTCTTCAGT     |
| p53 RT-F          | GTTCCGAGAGCTGAATGAGG     |
| p53 RT-R          | TCTGAGTCAGGCCCTTCTGT     |
| ER $\alpha$ RT-F  | GACCAACCTGGCAGACAGGGAGC  |
| ER $\alpha$ RT-R  | AACCGAGATGATGTAGCCAGCAGC |
| Caspase-3 RT-F    | AGAACTGGACTGTGGCATTGAG   |
| Caspase-3 RT-R    | GCTTGTCGGCATACTGTTTCAG   |
| Caspase-7 RT-F    | CTACCGCCGTGGGAACGATG     |
| Caspase-7 RT-R    | AGGCCCATACCTGTCACTTTATC  |
| GAPDH RT-F        | CAAATTCCATGGCACCGTCA     |
| GAPDH RT-R        | TCTCGCTCCTGGAAGATGGTGA   |
| siRNA-ER $\alpha$ | GGAUUUGACCCUCCAUGAU      |
| siRNA-p53         | GGAAAUUUGCGUGUGGAGU      |

**Supplementary Table S2: Raw data of miRNA PCR array analysis on the effects of estrogen (E2) treatment on alteration of 84 apoptotic miRNAs expression in SNU-387 cells (positive value indicated fold of upregulation of miRNAs and negative value indicated fold of downregulation of miRNAs).****Supplementary Table S3: List of genes related to apoptosis and predicted to be target genes of miR-23a**

| Gene                                                 | Symbol  | NCBI reference | PicTar score | Targetscan Score |
|------------------------------------------------------|---------|----------------|--------------|------------------|
| X-linked inhibitor of apoptosis                      | XIAP    | NM_001167      | #            | -0.26            |
| BCL2/adenovirus E1B 19kDa interacting protein 3-like | BNIP3L  | NM_004331      | 0.65         | -0.05            |
| Caspase-7                                            | CASP7   | NM_001227      | 4.67         | -0.18            |
| Fas (TNF receptor superfamily, member 6)             | FAS     | NM_000043      | #            | -0.33            |
| Topoisomerase (DNA) I                                | TOP1    | NM_003286      | 4.02         | -0.52            |
| Phosphatase and tensin homolog                       | PTEN    | NM_000314      | #            | -0.06            |
| Interleukin 6 receptor                               | IL6R    | NM_000565      | 4.48         | -0.17            |
| Signal transducer and activator of transcription 5B  | STAT5B  | NM_012448      | 3.22         | -0.27            |
| Suppressor of cytokine signaling 6                   | SOCS6   | NM_004232      | 6.34         | -0.29            |
| Tumor necrosis factor, alpha-induced protein 3       | TNFAIP6 | NM-007115      | 1.96         | -0.3             |
| p21 protein (Cdc42/Rac)-activated kinase 6           | PAK6    | NM_020168      | 4.28         | -0.16            |

Predictions were performed by PicTar (Krek et al., 2005) (<http://pictar.bio.nyu.edu/>) and TargetScan (Lewis et al., 2003) (<http://www.targetscan.org/>). Larger PicTar scores and more negative TargetScan scores indicate a higher likelihood. # No target predicted.

Human XIAP-3'UTR (NM 001167)

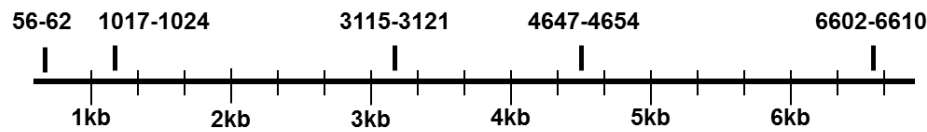

**Position 1: 56-62**

XIAP 3'UTR 5' ...CUGAUUGAAUGUGUGAUGUGAAC...

miR-23a 3' CCUUUAGGGACCGUUACACUA

**Position 2: 1017-1024**

XIAP 3'UTR 5' .....AACCUUUUUGGUGCCAAUGUGAA...

miR-23a 3' CCUUUAGGGACCGUUACACUA

**Position 3: 3115-3121**

XIAP 3'UTR 5' .....GUAGUGAGUGUAUAUAUUGUGAU...

miR-23a 3' CCUUUAGGGACCGUUACACUA

**Position 4: 4647-4654**

XIAP 3'UTR 5' .....UCAUACAGUUAACACAAUGUGAA...

miR-23a 3' CCUUUAGGGACCGUUACACUA

**Position 5: 6604-6610**

XIAP 3'UTR 5' .....GUAUUGUGAAUUAUCAUGUGAAA...

miR-23a 3' CCUUUAGGGACCGUUACACUA

Supplementary Figure S1: The possible target sites in the XIAP 3'UTR interact with miR-23a were predicted by TargetScan software (conserved target sites: 1017–1024 and 3115–3121; unconserved target sites: 56–62, 4647–4654 and 6604–6610).

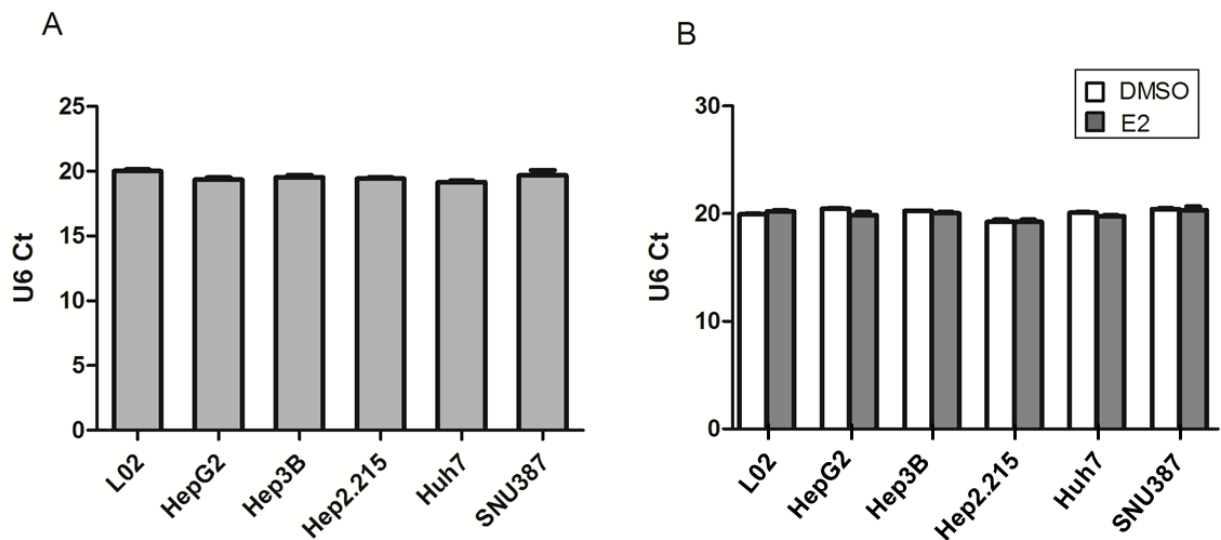

Supplementary Figure S2: Selection of U6 as the normalizer for relative quantitation of miRNA expression. A. Expression levels of U6 in six liver cell lines. B. Expression of U6 in the six liver cell lines was not response to E2 ( $10^{-8}$ M) and vehicle (DMSO) treatment. Values are given as real-time PCR cycle threshold numbers (Ct values).

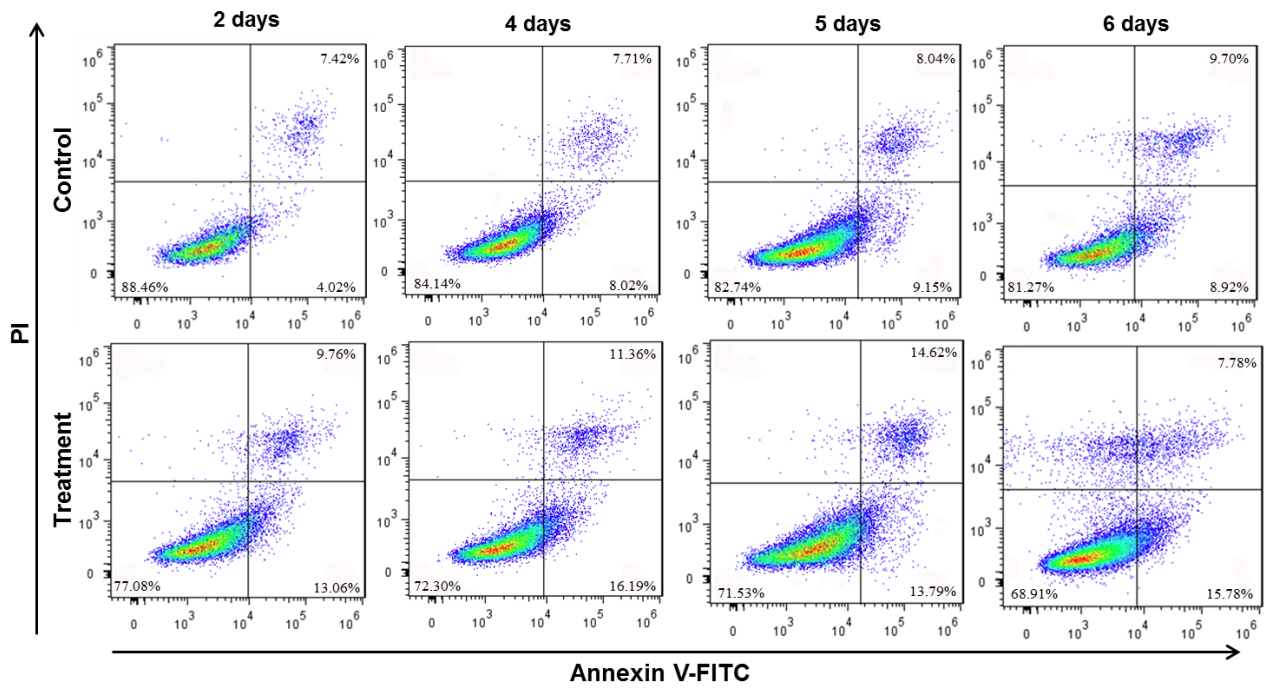

**Supplementary Figure S3: Apoptotic effect of estrogen (E2) on SNU-387 cells.** Induction of cell death was observed in SNU-387 cells treated with  $10^{-8}$ M E2 for different times (2, 3, 5, 6 days). Cells were treated as mentioned above, stained with Annexin-V FITC and propidium iodide (PI), and then analyzed by flow cytometry. Representative results from three independent experiments are shown. Numbers indicated the percentage of cells in each quadrant by flow cytometry analysis.
